# Supplementary material
Source: PubMed Central journal article supplement (PMC8284899)
Supplement: NIHMS1714387-supplement-S2.pdf [file NIHMS1714387-supplement-S2.pdf]

## Supporting information S2

### Small molecule HSP27 inhibitor abolishes androgen receptor in glioblastoma

Yaxin Li<sup>a</sup>, Cody M. Orahoske<sup>a</sup>, Werner J. Geldenhuys<sup>b</sup>, Asmita Bhattarai<sup>c</sup>, Abboud Sabbagh<sup>a</sup>,

Viharika Bobba<sup>a</sup>, Fatma M. Salem<sup>a</sup>, Wenjing Zhang<sup>a</sup>,

Girish C. Shukla<sup>c</sup>, Justin D. Lathia<sup>dc</sup>, Bingcheng Wang<sup>e</sup>, Bin Su<sup>a\*</sup>

<sup>a</sup>*Department of Chemistry, Center for Gene Regulation in Health and Disease, College of Sciences and Health Professions, Cleveland State University, 2121 Euclid Ave., Cleveland, OH, 44115, USA*

<sup>b</sup>*Department of Pharmaceutical Sciences, School of Pharmacy, West Virginia University, Morgantown, WV, 26506, USA*

<sup>c</sup>*Department of Biological, Geological, and Environmental Sciences, Center for Gene Regulation in Health and Disease, College of Sciences and Health Professions, Cleveland State University, 2121 Euclid Ave., Cleveland, OH, 44115, USA*

<sup>d</sup>*Department of Molecular Medicine, Lerner Research Institute, Cleveland Clinic, and Case Comprehensive Cancer Center, Cleveland, OH, 44195, USA*

<sup>e</sup>*Rammelkamp Center for Research and Department of Medicine, MetroHealth Campus, Case Comprehensive Cancer Center, Case Western Reserve University School of Medicine, Cleveland, OH, 44109, USA*

**Table S1.** Comparative hematology (Mean  $\pm$  SD) between different groups

| Parameters | Group (n=4 per group) |    |    |    |    | Reference Range |
|------------|-----------------------|----|----|----|----|-----------------|
|            | Control               | C1 | C2 | C3 | C4 |                 |

|                           |             |             |             |             |             |            |
|---------------------------|-------------|-------------|-------------|-------------|-------------|------------|
| WBC (10 <sup>3</sup> /μL) | 2.15±0.63   | 8.71±2.71   | 14.33±3.37  | 2.72±1.41   | 7.30±0.96   | 0.80-10.6  |
| Neu (10 <sup>3</sup> /μL) | 0.27±0.30   | 4.07±2.09   | 8.09±2.62   | 0.86±0.58   | 4.32±1.75   | 0.23-3.60  |
| Lym (10 <sup>3</sup> /μL) | 1.64±0.41   | 3.95±0.56   | 5.20±0.57   | 1.10±0.59   | 1.87±0.59   | 0.60-8.90  |
| Mon (10 <sup>3</sup> /μL) | 0.10±0.05   | 0.22±0.05   | 0.61±0.15   | 0.16±0.07   | 0.65±0.04   | 0.04-1.40  |
| Eos (10 <sup>3</sup> /μL) | 0.12±0.12   | 0.36±0.10   | 0.28±0.03   | 0.46±0.15   | 0.23±0.06   | 0.00-0.51  |
| Bas (10 <sup>3</sup> /μL) | 0.02±0.02   | 0.12±0.03   | 0.16±0.06   | 0.14±0.13   | 0.24±0.19   | 0.00-0.12  |
| Neu (%)                   | 12.43±3.34  | 44.65±9.19  | 55.90±5.09  | 29.67±7.53  | 58.00±16.41 | 6.50-50.0  |
| Lym (%)                   | 76.75±6.19  | 47.05±8.16  | 36.80±4.67  | 40.13±2.73  | 26.35±11.53 | 40.0-92.0  |
| Mon (%)                   | 4.75±1.44   | 2.55±0.33   | 4.20±0.14   | 6.17±1.03   | 8.95±0.64   | 0.90-18.0  |
| Eos (%)                   | 5.18±3.75   | 4.30±1.52   | 2.00±0.71   | 19.30±11.26 | 3.25±1.20   | 0.00-7.50  |
| Bas (%)                   | 0.90±0.70   | 1.45±0.25   | 1.10±0.14   | 4.73±1.71   | 3.45±3.04   | 0.00-1.50  |
| RBC (10 <sup>6</sup> /μL) | 7.24±2.08   | 7.64±0.64   | 7.59±1.21   | 9.41±2.10   | 8.33±0.13   | 6.80-12.00 |
| HGB (g/dL)                | 13.10±3.13  | 13.96±0.60  | 13.50±2.12  | 17.47±3.43  | 15.40±0.28  | 10.5-19.0  |
| HCT (%)                   | 36.48±10.57 | 39.65±2.53  | 38.80±5.52  | 47.20±11.75 | 40.85±1.20  | 37.2-58.0  |
| MCV (fL)                  | 50.43±0.90  | 51.95±1.59  | 51.2±0.85   | 50.00±1.85  | 49.05±0.64  | 42.6-55.6  |
| MCH (pg)                  | 18.38±1.45  | 18.28±0.90  | 17.85±0.07  | 18.63±0.59  | 18.50±0.00  | 13.0-19.8  |
| MCHC (g/dL)               | 36.45±2.61  | 35.18±1.07  | 34.85±0.49  | 37.30±2.19  | 37.70±0.57  | 26.0-37.9  |
| RDW-CV (%)                | 12.58±0.46  | 13.78±0.37  | 13.40±0.71  | 17.50±1.75  | 14.40±0.14  | 11.1-21.1  |
| PLT (10 <sup>3</sup> /μL) | 180.3±191.8 | 983.8±392.1 | 977.5±419.3 | 551.3±101.9 | 1075±585.5  | 565-1849   |
| MPV (fL)                  | 5.70±0.22   | 5.95±0.24   | 6.15±0.07   | 6.47±0.31   | 7.40±0.28   | 3.6-6.8    |

\*Reference ranges obtained from Heska hematology analyzer based on the age, sex of species
